# Supplementary material for: Fluorescence Spectra of Prototropic Forms of Fluorescein and Some Derivatives and Their Potential Use for Calibration-Free pH Sensing
Source: MDPI journal article supplement (doi:10.3390/s24051705), 2024-03-06
Supplement: s1 [file s1]

Supplementary Materials for

# Fluorescence Spectra of Prototropic Forms of Fluorescein and Some Derivatives and Their Potential Use for Calibration-Free pH Sensing

Bernard Gauthier-Manuel <sup>1</sup>, Chafia Benmouhoub <sup>1,2</sup> and Bruno Wacogne <sup>1,3,\*</sup>

<sup>1</sup> CNRS, Institut FEMTO-ST, Université de Franche-Comté, 25000 Besançon, France; bernardgauthier55@gmail.com (B.G.-M.); benmouhoubc@gmail.com (C.B.)

<sup>2</sup> SATT Grand Est, SAYENS, 25000 Besançon, France

<sup>3</sup> INSERM CIC 1431, Besançon University Hospital, 25030 Besançon, France

\* Correspondence: bruno.wacogne@univ-fcomte.fr; Tel.: +33-3-81-66-63-88

**Table S1.** Designation, supplier, and part numbers.

| Part N° in Figure 1 | Designation                              | Supplier/Country                               | Reference                |
|---------------------|------------------------------------------|------------------------------------------------|--------------------------|
| 1                   | Light emitting diode                     | Thorlabs, USA, supplier France                 | M470F3                   |
| 2                   | Multimode patch cable                    | Thorlabs, USA, supplier France                 | M19L01                   |
| 3                   | Variable attenuator                      | CivilLaser, China                              | FVA-UV                   |
| 4                   | Fluorescence beam splitter<br>Including: | DORIC Lenses, Canada                           | Custom assembled         |
|                     | Exc. filter #1                           | Semrock, supplier France Optoprim              | FF01-457/50-25           |
|                     | Exc. filter #2                           | Semrock, supplier France Optoprim              | FF01-474/27-25           |
|                     | Dicroic mirror                           | Semrock, supplier France Optoprim              | LPD02-488RU-25           |
|                     | Em. filter                               | Semrock, supplier France Optoprim              | LP02-488RU-25            |
| 5                   | Custom patch cable                       | DORIC Lenses, Canada                           | Custom assembled         |
| 6                   | Ferule interconnect                      | Thorlabs, USA, supplier France                 | ADAF2                    |
| 7                   | Custom bare fiber                        | DORIC Lenses, Canada                           | CuFG200UEAstom assembled |
|                     | Including:<br>Multimode fiber            | Thorlabs, USA, supplier France                 |                          |
| 8                   | Test solution<br>Containing:             |                                                |                          |
|                     | NaCl 1M                                  | Merck, Sigma Aldrich, Germany, supplier France | CAS: 7647-14-5           |
|                     | Fluorescein                              | Merck, Sigma Aldrich, Germany, supplier France | CAS: 2321-07-5           |
|                     | FITC                                     | MedChemTronica, Sweden                         | CAS: 3326-32-7           |
|                     | FAM                                      | MedChemTronica, Sweden                         | CAS: 3301-79-9           |
|                     | pH adjusted with:                        |                                                |                          |
|                     | Nafion, 50 µm                            | IonPower, US                                   | NR212                    |
| 9                   | OH- ion exchange resin                   | Merck, Sigma Aldrich, Germany, supplier France | CAS: 39339-85-0          |
|                     |                                          |                                                |                          |
| 9                   | Magnetic stirrer                         | LLG LABWARE, Germany, supplier France          | uniSTIRRER 1             |
| 10                  | pH meter                                 | Hanna Instruments France, France               | HI 991001                |
| 11                  | Multimode patch cable                    | Thorlabs, USA, supplier France                 | M22L01                   |
| 12                  | Spectrometer                             | Ocean Optics, USA, supplier France             | QE Pro ES                |
| 13                  | Computer                                 | Non-applicable                                 |                          |

**Table S2.** List of parameters for each molecule including starting values for the minimization algorithm.

| Coefficient    | Starting Value        | Molecule              |                       |                       |
|----------------|-----------------------|-----------------------|-----------------------|-----------------------|
|                |                       | Fluorescein           | FITC                  | FAM                   |
| $\tilde{K}a_1$ | $1.00 \times 10^{-2}$ | $9.25 \times 10^{-4}$ | $1.90 \times 10^{-2}$ | $1.54 \times 10^{-2}$ |
| $\tilde{K}a_2$ | $1.00 \times 10^{-5}$ | $5.66 \times 10^{-6}$ | $5.26 \times 10^{-6}$ | $4.04 \times 10^{-5}$ |
| $\tilde{K}a_3$ | $1.00 \times 10^{-6}$ | $5.46 \times 10^{-7}$ | $9.43 \times 10^{-7}$ | $2.79 \times 10^{-6}$ |
| Aa1            | 0.28                  | 0.21                  | 0.27                  | 0.23                  |
| Aa2            | 0.44                  | 0.38                  | 0.37                  | 0.32                  |
| Aa3            | 0.47                  | 0.55                  | 0.56                  | 0.53                  |
| Ac1            | 0.23                  | 0.28                  | 0.21                  | 0.10                  |
| Ac2            | 0.30                  | 0.29                  | 0.30                  | 0.26                  |
| Ac3            | 0.74                  | 0.75                  | 0.66                  | 0.80                  |
| Ad1            | 0.41                  | 0.40                  | 0.43                  | 0.45                  |
| Ad2            | 0.08                  | 0.07                  | 0.08                  | 0.04                  |
| Ad3            | 0.73                  | 0.77                  | 0.73                  | 0.67                  |
| An1            | 0.45                  | 0.44                  | 0.43                  | 0.52                  |
| An2            | 0.63                  | 0.67                  | 0.64                  | 0.63                  |
| An3            | 0.32                  | 0.27                  | 0.32                  | 0.30                  |
| Ta1            | 620                   | 467.25                | 581.37                | 649.77                |
| Ta2            | 1000                  | 952.70                | 985.78                | 1939.47               |
| Ta3            | 2768                  | 3080.75               | 2857.80               | 3717.31               |
| Tc1            | 995                   | 1111.72               | 940.00                | 1115.80               |
| Tc2            | 4091                  | 4681.94               | 4699.53               | 4551.25               |
| Tc3            | 2783                  | 2722.59               | 2952.21               | 3133.19               |
| Td1            | 1843                  | 1835.51               | 1887.99               | 2194.87               |
| Td2            | 2978                  | 2744.48               | 3032.09               | 3193.47               |
| Td3            | 1084                  | 1154.68               | 1236.10               | 1149.87               |
| Tn1            | 1108                  | 1129.23               | 1095.53               | 1198.29               |
| Tn2            | 4021                  | 3812.93               | 3784.18               | 3724.71               |
| Tn3            | 1424                  | 1231.79               | 1536.62               | 1308.06               |
| Ya1            | 507                   | 507.33                | 512.23                | 513.00                |
| Ya2            | 518                   | 516.72                | 523.52                | 520.97                |
| Ya3            | 532                   | 523.61                | 536.07                | 533.80                |
| Yc1            | 509                   | 504.95                | 527.39                | 508.53                |
| Yc2            | 570                   | 570.19                | 565.38                | 573.55                |
| Yc3            | 535                   | 536.12                | 553.71                | 533.70                |
| Yd1            | 534                   | 536.59                | 543.35                | 533.83                |
| Yd2            | 565                   | 573.52                | 578.71                | 593.04                |
| Yd3            | 511                   | 511.42                | 517.58                | 512.28                |
| Yn1            | 508                   | 510.47                | 512.86                | 511.12                |
| Yn2            | 544                   | 544.33                | 552.35                | 549.95                |
| Yn3            | 542                   | 543.47                | 544.51                | 545.73                |
